# Supplementary material
Source: Royal Society of Chemistry journal article supplement (doi:10.1039/d6ce00303f)
Supplement: d6ce00303f1.pdf [file d6ce00303f1.pdf]

## Supporting Information for

### **Boosting Oxygen Evolution Activity via Cr-Induced Electronic and Structural Modulation in NiFe-LDH Nanosheets**

Yinfeng Wang<sup>a,b,‡</sup>, Yuhao Zhou<sup>a,‡</sup>, Yangchun Guo<sup>a,b</sup>, Xuan Zhao<sup>a,b</sup>, Zhenhong He<sup>b,\*</sup>,  
Shufang Ma<sup>a</sup>, Bingshe Xu<sup>a,c</sup>, Xiaodong Hao<sup>a,\*</sup>

*<sup>a</sup>Xi'an Key Laboratory of Compound Semiconductor Materials and Devices, School of Physics & Information Science, Shaanxi University of Science & Technology, Xi'an 710021, China*

*<sup>b</sup>Shaanxi Key Laboratory of Chemical Additives for Industry, College of Chemistry and Chemical Engineering, Shaanxi University of Science & Technology, Xi'an 710021, China*

*<sup>c</sup>Key Laboratory of Interface Science and Engineering in Advanced Materials, Ministry of Education, Taiyuan University of Technology, Taiyuan, 030024, China*

\*Corresponding author: [hao.xiaodong@sust.edu.cn](mailto:hao.xiaodong@sust.edu.cn); [hezhenhong@sust.edu.cn](mailto:hezhenhong@sust.edu.cn)

## Experimental Section

**Chemicals and Materials.** The following chemicals were used in this experiment: nickel(II) nitrate hexahydrate ( $\text{Ni}(\text{NO}_3)_2 \cdot 6\text{H}_2\text{O}$ ), iron(III) nitrate nonahydrate ( $\text{Fe}(\text{NO}_3)_3 \cdot 9\text{H}_2\text{O}$ ), chromium(III) chloride hexahydrate ( $\text{CrCl}_3 \cdot 6\text{H}_2\text{O}$ ), urea ( $\text{CO}(\text{NH}_2)_2$ ), ammonium fluoride ( $\text{NH}_4\text{F}$ ), and potassium hydroxide ( $\text{KOH}$ ). All reagents were of analytical grade and used without further purification.

**Synthesis of Materials.** NiFeCr-LDHs were synthesized according to the following procedure. First, predetermined amounts of  $\text{Ni}(\text{NO}_3)_2 \cdot 6\text{H}_2\text{O}$ ,  $\text{Fe}(\text{NO}_3)_3 \cdot 9\text{H}_2\text{O}$ , and  $\text{CrCl}_3 \cdot 6\text{H}_2\text{O}$  were dissolved in 40 mL of deionized water contained in a beaker. The total concentration of metal cations was fixed at 2.5 mmol, and the molar ratio of Ni:(Fe + Cr) was maintained at 4:1. While stirring, 12.5 mmol of urea and 3.5 mmol of  $\text{NH}_4\text{F}$  were added to the solution. The mixture was subsequently stirred vigorously using a magnetic stirrer for 30 minutes. The resulting mixture was then transferred into a 70 mL Teflon-lined autoclave and heated in a homogeneous reactor at 120 °C for 8 hours. After natural cooling to room temperature, the product was collected and washed several times with ethanol and deionized water, respectively. The washed solid was dried in a vacuum oven at 60 °C for 6 hours, and the final product was labeled as NiFeCr-LDHs. By varying the Fe:Cr molar ratio while keeping the remaining experimental steps unchanged, a series of samples were prepared. Specifically, when the Fe:Cr ratios were set to 7:1, 3:1, 5:3, and 1:1, the corresponding samples were designated as NiFeCr-1, NiFeCr-2, NiFeCr-3, and NiFeCr-4, respectively. For comparison, a reference sample labeled NiFe-LDH was also prepared under the condition of a Ni: Fe molar ratio of 4:1.

**Materials Characterization.** The crystal structure of the powder samples was determined by X-ray powder diffraction (XRD) analysis using a Rigaku D/MAX-2500/pc diffractometer. X-ray photoelectron spectroscopy (XPS) measurements were conducted at the KBSI Daeduk Center with a Kratos AXIS Ultra spectrometer. For electron microscopy characterization, a 10  $\mu\text{L}$  aliquot of the redispersed sample was drop-cast onto a carbon film approximately 5 nm thick. Low-magnification transmission electron microscopy (TEM) images were acquired using a JEM-2100Plus (JEOL) microscope operated at an accelerating voltage of 200 kV. Aberration-corrected scanning transmission electron microscopy (STEM) characterization was performed using a JEM-ARM 300F microscope equipped with probe and image correctors and a cold field emission gun, operated at 300 kV. The probe convergence semi-angle was approximately 24.5 mrad. Annular bright-field (ABF) and high-angle annular dark-field (HAADF) images were collected with angular ranges of 11–22 mrad and 54–220 mrad, respectively. Elemental analysis was carried out using energy-dispersive X-ray spectroscopy (EDS) with a dual-EDS system (JED-2300T) featuring two large-area, windowless silicon drift detectors. The total solid angle for EDS collection was 2.2 sr. Furthermore, electron energy loss spectroscopy (EELS) was performed using a Gatan camera system (GIF Quantum ER Model 965) to obtain valence state information of the samples. The EPR measurement was performed on a Bruker Emxplus instrument from Bruker Corporation, Germany.

**Electrochemical Measurements.** All electrochemical tests were conducted at room temperature ( $25 \pm 1$  °C) using a CHI660D electrochemical workstation. A standard three-electrode system was employed, consisting of a glassy carbon working electrode (3 mm in diameter), a graphite rod counter electrode, and an Hg/HgO reference electrode. Electrode activation was performed by linear sweep voltammetry at a scan rate of  $5 \text{ mV s}^{-1}$ , sweeping from 0 V to  $-2$  V versus the Hg/HgO reference electrode. Electrochemical impedance spectroscopy (EIS) was used to investigate electrode kinetics and interfacial charge transfer resistance. All EIS data were acquired at a constant potential of 1.50 V versus the reversible hydrogen electrode (RHE), with a sinusoidal perturbation amplitude of 5 mV over a frequency range from 100 kHz to 0.1 Hz. Before each measurement, the working electrode was pre-stabilized at this potential for 60 s to allow the reaction current to reach a steady state, thereby avoiding transient effects on the impedance response. To accurately characterize the electrochemical polarization, all steady-state polarization curves were corrected with 85%  $iR$  compensation to eliminate the influence of the ohmic drop in solution. The potentials recorded versus the Hg/HgO reference electrode were converted to the RHE scale using the Nernst equation. The conversion follows the equation below:

$$E_{RHE} = E_{Hg/HgO} + 0.0592 \times pH + 0.098 \text{ V (25}^\circ\text{C)}$$

where  $E_{Hg/HgO}$  is the standard potential of the Hg/HgO electrode at 25 °C.

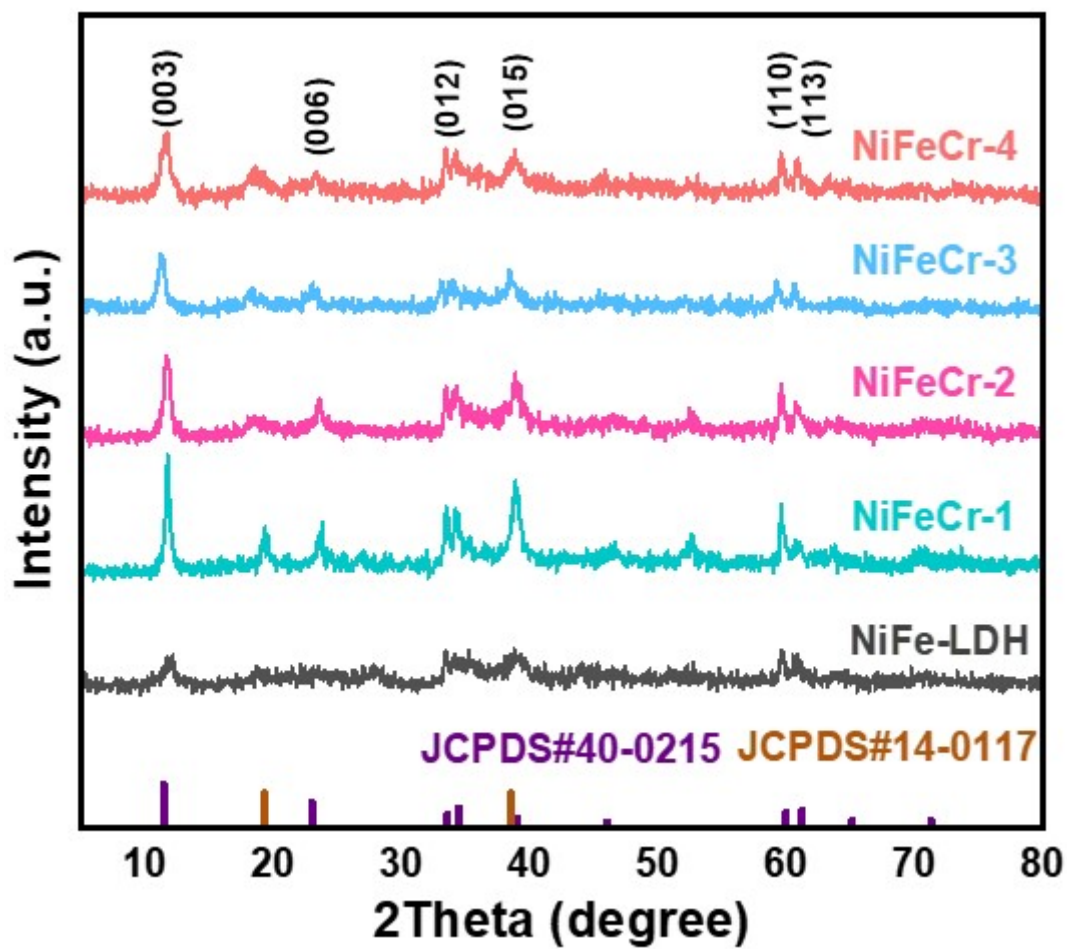

Fig. S1 XRD patterns of the as-prepared NiFe-LDH and NiFeCr-LDHs samples.

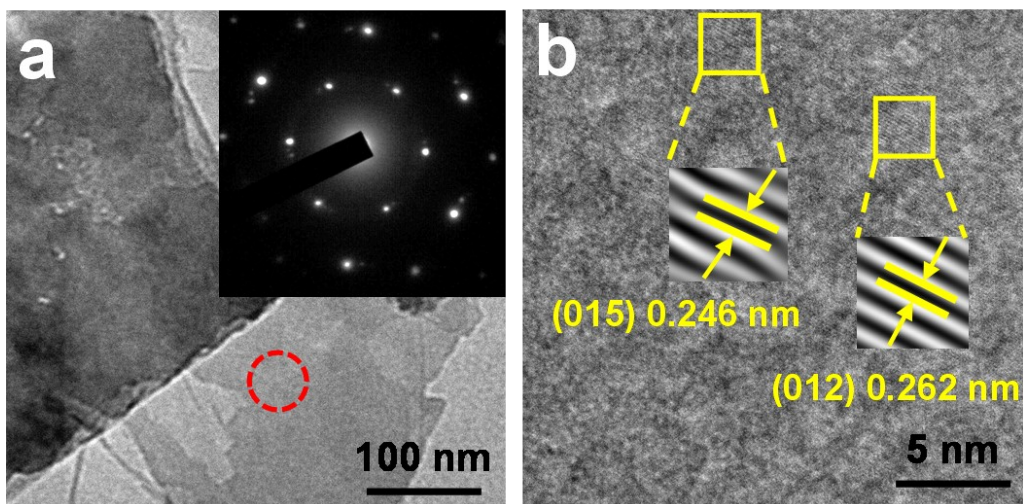

**Fig. S2** TEM images of the prepared NiFe-LDH samples. The corresponding SAED pattern for the NiFe-LDH sample is provided in the inset.

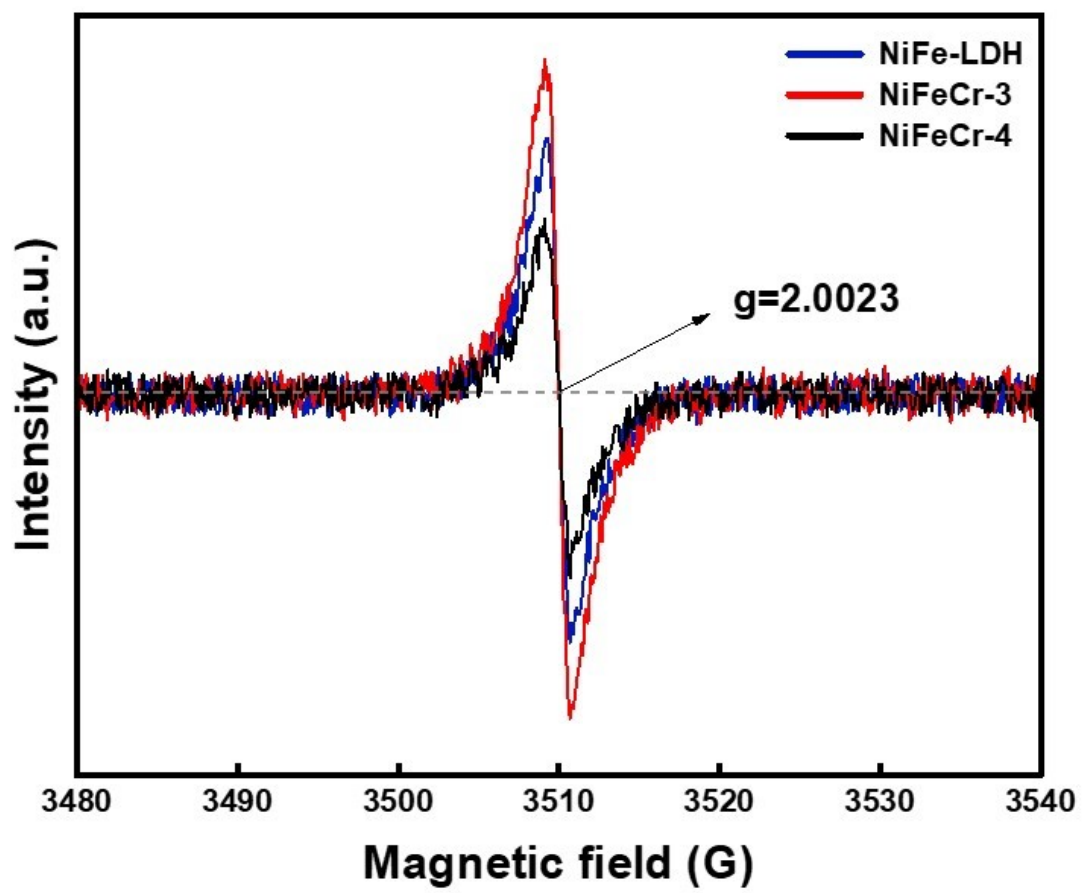

**Fig. S3** EPR spectra of NiFe-LDH, NiFeCr-3, and NiFeCr-4 nanosheets.

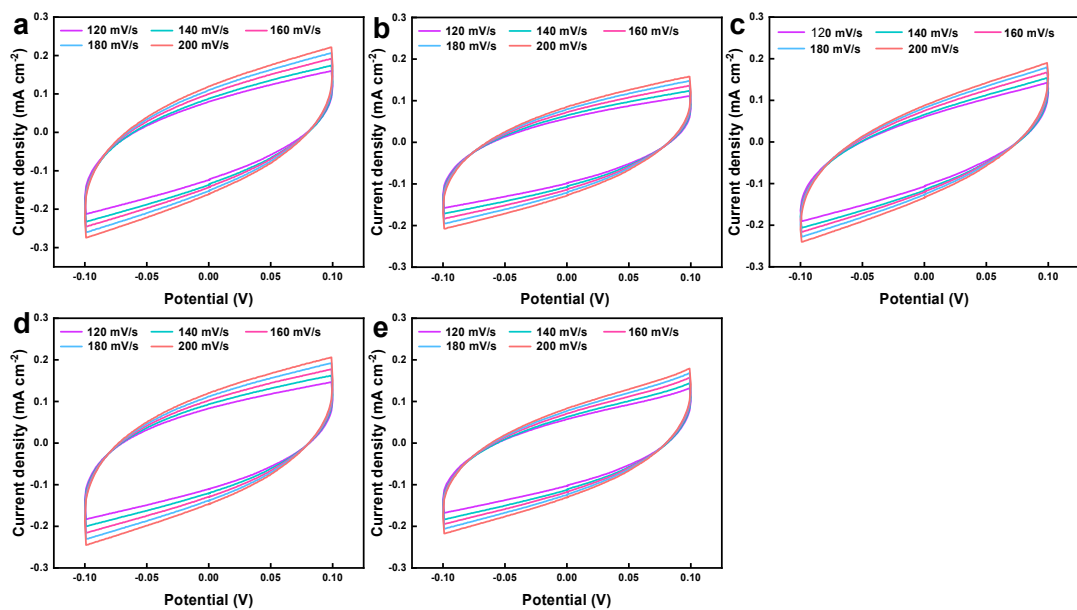

**Fig. S4** Cyclic voltammetry curves of (a) NiFe-LDH (b) NiFeCr-1 (c) NiFeCr-2 (d) NiFeCr-3 (e) NiFeCr-4 at different scan rates for OER.

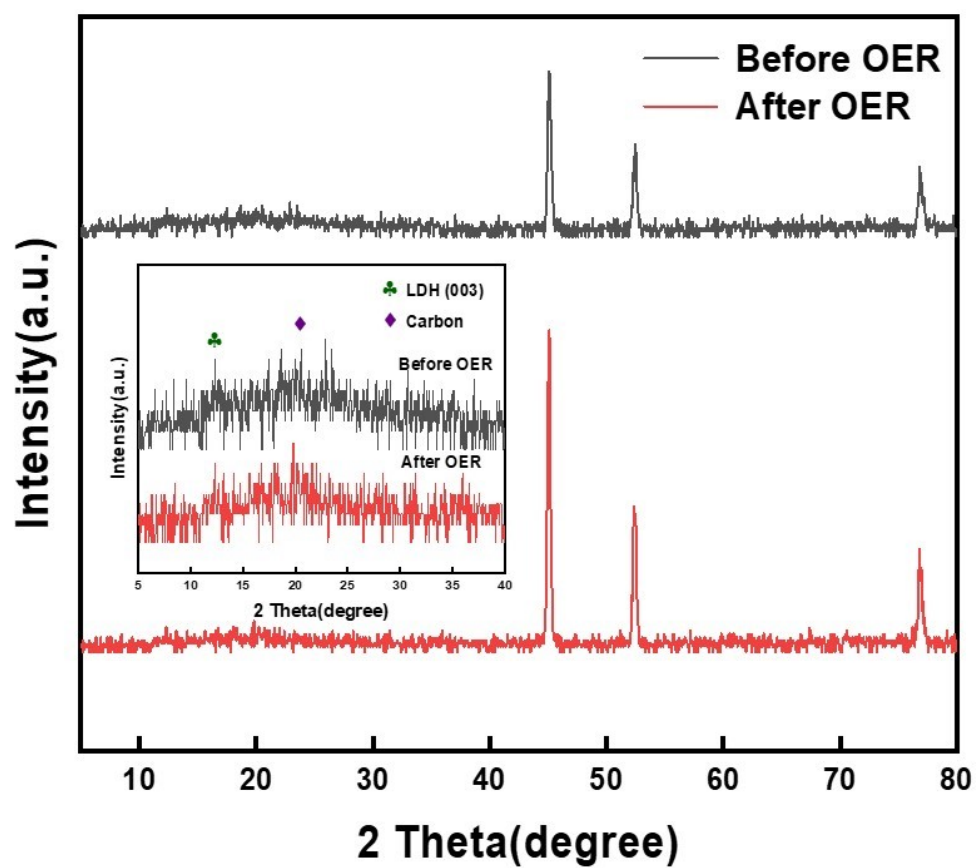

**Fig. S5** XRD patterns of nickel foam loaded with 0.5 mg carbon black and 2.5 mg catalyst before and after the electrocatalytic reaction.

**Table S1** Comparison of OER performance for NiFeCr-3 with recently reported transition-metal-based electrocatalysts in alkaline electrolyte.

| Catalysts                                                          | $\eta_{100}$<br>(mV) | Electrolyte    | References                                  |
|--------------------------------------------------------------------|----------------------|----------------|---------------------------------------------|
| <b>NiFeCr-3</b>                                                    | <b>331</b>           | <b>1 M KOH</b> | <b>This work</b>                            |
| <b>Cr-CoXP</b>                                                     | 334                  | 1 M KOH        | Adv. Funct. Mater. 33 (2023)2214081.        |
| <b>Cr<sub>x</sub>Ni<sub>1-x</sub>Se<sub>2</sub>/CC<sub>b</sub></b> | 400                  | 1 M KOH        | Nano Res. 17 (3) (2024)1199-1208.           |
| <b>Ni<sub>3</sub>S<sub>4</sub>@Ni(OH)<sub>2</sub></b>              | 356                  | 1 M KOH        | J. Colloid Interf Sci. 654 (2024) 66002D75. |
| <b>NiMoO<sub>4</sub>-S/Ni<sub>3</sub>S<sub>2</sub>/NF</b>          | 355                  | 1 M KOH        | J. Alloys Compd. 970 (2024) 172530.         |
| <b>CoFeGaNiZn</b>                                                  | 370                  | 1 M KOH        | Nano Res.15 (2021) 4799–4806.               |
| <b>FeCoNi alloy</b>                                                | 400                  | 1 M KOH        | Chemistry Select. 2 (2017) 1630-1636.       |
| <b>FeNiMnCrCu</b>                                                  | 342                  | 1 M KOH        | Hydrog. Energy. 47 (2022) 31330–31341.      |
| <b>Ni SAs@S/N-FCS</b>                                              | 335                  | 1 M KOH        | Angew. Chem. Int. Ed. 61 (2022) 202212542.  |
| <b>CoFe/CoFe<sub>2</sub>O<sub>4</sub>@NC</b>                       | 370                  | 1 M KOH        | Chem. Eng. J. 523 (2025) 168363.            |
| <b>FeCoMnCuAl</b>                                                  | 370                  | 1 M KOH        | Prog. Nat. Sci.:Mater. Int. 34 (2024) 880.  |
| <b>NiFe-PBA-gel-cal</b>                                            | 340                  | 1 M KOH        | Adv. Sci. 9 (2022) 2200146.                 |
| <b>Ni<sub>4/5</sub>Fe<sub>1/5</sub>-LDHs-S-2</b>                   | 346                  | 1 M KOH        | Chin. J. Catal. 41 (2020) 847.              |
| <b>NF-C/CoS/NiOOH</b>                                              | 361                  | 1 M KOH        | Nano-Micro Lett. 12 (2020) 162.             |
